# Supplementary material for: The Exploitation of pH-Responsive Eudragit-Coated Mesoporous Silica Nanostructures in the Repurposing of Terbinafine Hydrochloride for Targeted Colon Cancer Inhibition: Design Optimization, In Vitro Characterization, and Cytotoxicity Assessment
Source: MDPI journal article supplement (doi:10.3390/pharmaceutics15122677), 2023-11-26
Supplement: s1 [file s1]

## Supplementary Material

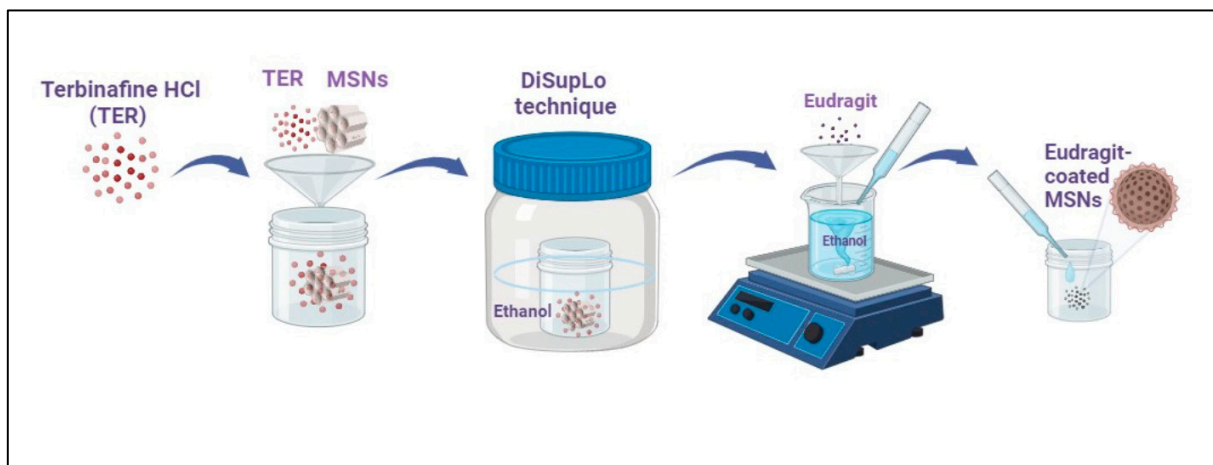

Figure S1. Graphical diagram of the Eud/TER- MSNs formulation.

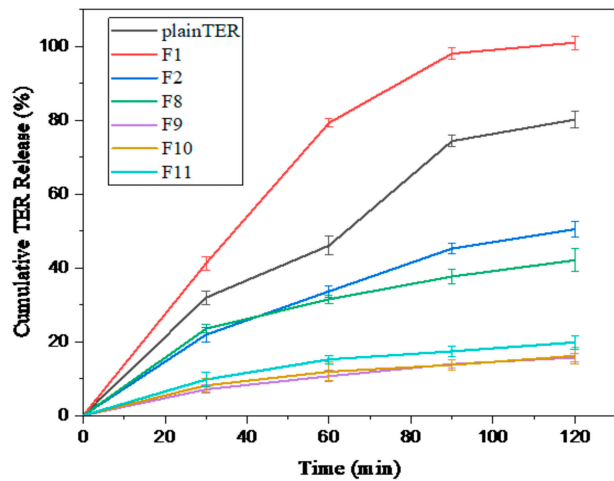

(a)

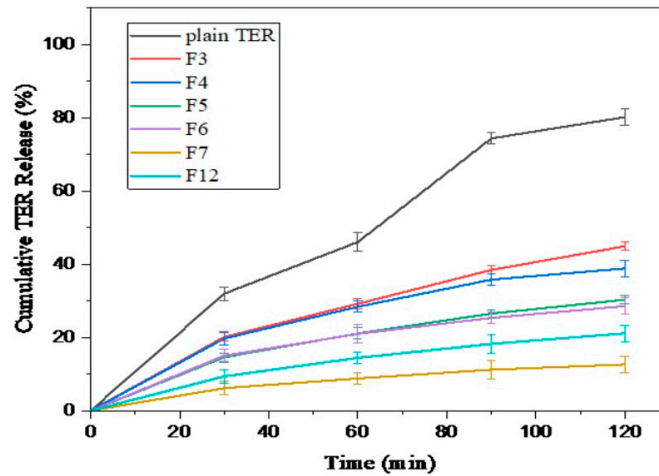

(b)

Figure S2. Cumulative release profiles of the coated and uncoated formulas of (a) TER-loaded MSNs containing SBA-15 in pH 1.2 (b) TER-loaded MSNs containing MCM-41 in pH 1.2 in comparison to plain TER.

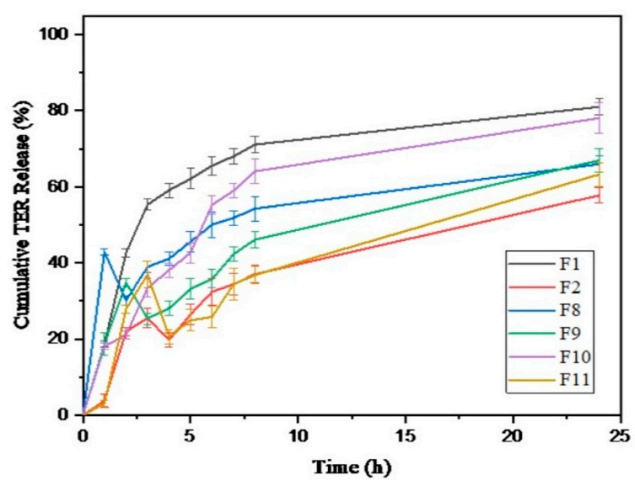

(a)

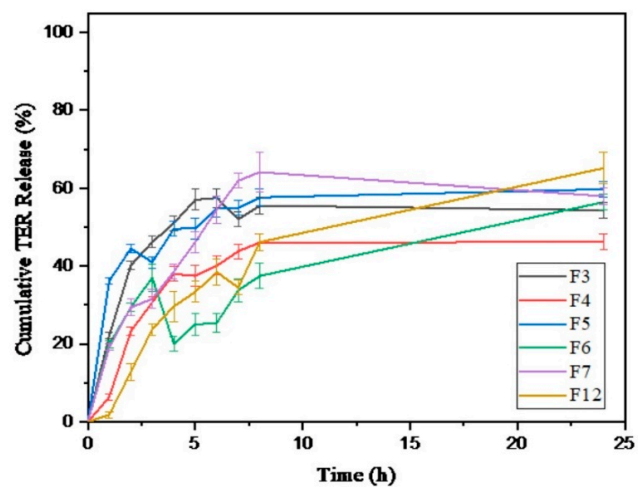

(b)

**Figure S3.** Cumulative release profiles of the coated and uncoated formulas of (a) TER-loaded MSNs containing SBA-15 in pH 7.4 (b) TER-loaded MSNs containing MCM-41 in pH 7.4.
